# Supplementary material for: Consequences of Daily Administered Parathyroid Hormone on Myeloma Growth, Bone Disease, and Molecular Profiling of Whole Myelomatous Bone
Source: PLoS One. 2010 Dec 20;5(12):e15233. doi: 10.1371/journal.pone.0015233 (PMC3004797; doi:10.1371/journal.pone.0015233)
Supplement: Table S1 — Genes whose expression was significantly upregulated or downregulated by PTH treatment in whole human bone from SCID-hu mice. SCID-hu mice engrafted with Hg myeloma cells were treated with saline or PTH for 4 weeks. Mice were sacrificed 2 hours after the last injection. RNA extracted from the whole myelomatous human bone (five bones/group) was subjected to global gene expression profiling. Positive (POS) or negative (NEG) expression of those genes in Hg myeloma cells is indicated to assess cellular source of these genes (e.g., microenvironmental and/or tumor cells). (XLS) [file pone.0015233.s001.xls]

## Sheet: Sheet1
Probe	Title	Symbol	Location	iPTH/Saline ratio	P Value	Expression by Hg MM cells
209959_at	nuclear receptor subfamily 4, group A, member 3	NR4A3	9q22	20.0803	0.0220699	NEG
230895_at	Hyaluronan and proteoglycan link protein 1	N/A	N/A	9.89592	0.0344456	NEG
209291_at	inhibitor of DNA binding 4, dominant negative helix-loop-helix protein	ID4	6p22-p21	7.74545	0.0333267	NEG
212977_at	chemokine orphan receptor 1	CXCR7	2q37.3	7.13982	0.0419813	NEG
202388_at	regulator of G-protein signalling 2, 24kDa	RGS2	1q31	6.30808	0.0081579	POS
210643_at	tumor necrosis factor (ligand) superfamily, member 11	TNFSF11	13q14	6.05324	0.0304976	NEG
205990_s_at	wingless-type MMTV integration site family, member 5A	WNT5A	3p21-p14	5.59713	0.0422655	NEG
209684_at	Ras and Rab interactor 2	RIN2	20p11.22	5.57995	0.0449754	NEG
227140_at	Inhibin, beta A (activin A, activin AB alpha polypeptide)	N/A	N/A	5.36967	0.0576117	NEG
223623_at	esophageal cancer related gene 4 protein	C2orf40	2q12.2	5.17378	0.047229	NEG
210119_at	potassium inwardly-rectifying channel, subfamily J, member 15	KCNJ15	21q22.2	5.14738	0.0250849	NEG
209466_x_at	pleiotrophin (heparin binding growth factor 8)	PTN	7q33-q34	5.13699	0.0417909	NEG
232195_at	G protein-coupled receptor 158	GPR158	10p12.1	4.97025	0.0422888	NEG
202988_s_at	regulator of G-protein signalling 1	RGS1	1q31	4.96384	0.00253209	POS
204035_at	secretogranin II (chromogranin C)	SCG2	2q35-q36	4.7391	0.027042	NEG
230109_at	phosphodiesterase 7B	PDE7B	6q23-q24	4.6801	0.0351689	NEG
215271_at	tenascin N	TNN	1q23-q24	4.59842	0.0494931	POS
228507_at	Phosphodiesterase 3A, cGMP-inhibited	PDE3A	N/A	4.56452	0.018529	NEG
1553613_s_at	forkhead box C1	FOXC1	6p25	4.46721	0.0164517	NEG
222484_s_at	chemokine (C-X-C motif) ligand 14	CXCL14	5q31	4.29076	0.0138007	NEG
219511_s_at	synuclein, alpha interacting protein (synphilin)	SNCAIP	5q23.1-q23.3	4.22747	0.0246631	NEG
204776_at	thrombospondin 4	THBS4	5q13	4.19554	0.0297917	NEG
205932_s_at	msh homeo box homolog 1 (Drosophila)	MSX1	4p16.3-p16.1	4.18137	0.0246639	NEG
204600_at	EPH receptor B3	EPHB3	3q21-qter	4.14804	0.0396349	NEG
213004_at	angiopoietin-like 2	ANGPTL2	9q34	4.1312	0.0139181	NEG
206956_at	bone gamma-carboxyglutamate (gla) protein (osteocalcin)	BGLAP	1q25-q31	4.11321	0.0583543	NEG
213993_at	spondin 1, extracellular matrix protein	SPON1	11p15.2	4.11285	0.0268948	NEG
204320_at	collagen, type XI, alpha 1	COL11A1	1p21	4.0835	0.0200162	NEG
228740_at	Homo sapiens, clone IMAGE:5276765, mRNA	N/A	N/A	4.05357	0.0317576	NEG
223235_s_at	SPARC related modular calcium binding 2	SMOC2	6q27	4.02881	0.0172804	NEG
213800_at	complement factor H	CFH	1q32	3.92204	0.0458939	NEG
205475_at	scrapie responsive protein 1	SCRG1	4q31-q32	3.90271	0.0345617	NEG
206796_at	WNT1 inducible signaling pathway protein 1	WISP1	8q24.1-q24.3	3.85433	0.0509258	NEG
205870_at	bradykinin receptor B2	BDKRB2	14q32.1-q32.2	3.82425	0.0010053	NEG
213362_at	Protein tyrosine phosphatase, receptor type, D	PTPRD	9p23-p24.3	3.77339	0.037372	NEG
212667_at	secreted protein, acidic, cysteine-rich (osteonectin)	SPARC	5q31.3-q32	3.75429	0.0477744	NEG
204440_at	CD83 antigen (activated B lymphocytes, immunoglobulin superfamily)	CD83	6p23	3.73229	0.043429	POS
211709_s_at	C-type lectin domain family 11, member A	CLEC11A	19q13.3	3.64789	0.0180684	NEG
226806_s_at	Full length insert cDNA clone ZD69D05	N/A	N/A	3.58567	0.0418152	NEG
213479_at	neuronal pentraxin II	NPTX2	7q21.3-q22.1	3.56443	0.0559304	NEG
228962_at	Phosphodiesterase 4D, cAMP-specific	PDE4D	5q12	3.56381	0.0471215	NEG
210367_s_at	prostaglandin E synthase	PTGES	9q34.3	3.52545	0.00326521	NEG
221541_at	cysteine-rich secretory protein LCCL domain containing 2	CRISPLD2	16q24.1	3.50022	0.00369099	NEG
213071_at	dermatopontin	DPT	1q12-q23	3.45241	0.0472693	NEG
224973_at	family with sequence similarity 46, member A	FAM46A	6q14	3.42637	0.0279999	NEG
222043_at	clusterin	CLU	8p21-p12	3.42498	0.0323313	NEG
209189_at	v-fos FBJ murine osteosarcoma viral oncogene homolog	FOS	14q24.3	3.40034	0.0454126	POS
225464_at	FERM domain containing 6	FRMD6	14q22.1	3.38438	0.0410959	NEG
204557_s_at	DAZ interacting protein 1	DZIP1	13q32.1	3.35078	0.0507742	NEG
224657_at	mitogen-inducible gene 6	ERRFI1	1p36	3.32456	0.0316807	NEG
227419_x_at	placenta-specific 9	PLAC9	10q22.3	3.32413	0.0415077	NEG
236277_at	P21 (CDKN1A)-activated kinase 3	N/A	N/A	3.31016	0.0140137	NEG
201289_at	cysteine-rich, angiogenic inducer, 61	CYR61	1p31-p22	3.3054	0.00189622	NEG
220595_at	PDZ domain containing RING finger 4	PDZRN4	12q12	3.30449	0.023183	POS
213150_at	homeo box A10	HOXA10	7p15-p14	3.2654	0.0474746	POS
203083_at	thrombospondin 2	THBS2	6q27	3.24125	0.0325756	NEG
201744_s_at	lumican	LUM	12q21.3-q22	3.23467	0.0312932	NEG
205330_at	meningioma (disrupted in balanced translocation) 1	MN1	22q11|22q12.1	3.22785	0.0334618	NEG
211959_at	insulin-like growth factor binding protein 5	IGFBP5	2q33-q36	3.20851	0.0274666	NEG
214247_s_at	dickkopf homolog 3 (Xenopus laevis)	DKK3	11p15.2	3.17423	0.038937	NEG
219087_at	asporin (LRR class 1)	ASPN	9q22	3.17197	0.0342469	NEG
211896_s_at	decorin	DCN	12q21.33	3.17062	0.0592085	NEG
52837_at	KIAA1644 protein	LL22NC03-75B3.6	N/A	3.16513	0.00891207	NEG
207069_s_at	SMAD, mothers against DPP homolog 6 (Drosophila)	SMAD6	15q21-q22	3.15527	0.0582241	NEG
212812_at	CDNA: FLJ22642 fis, clone HSI06970	N/A	N/A	3.11264	0.0378031	POS
221730_at	collagen, type V, alpha 2	COL5A2	2q14-q32	3.10857	0.0461961	NEG
213429_at	CDNA FLJ26539 fis, clone KDN09310	N/A	N/A	3.10216	0.0210529	NEG
222453_at	cytochrome b reductase 1	CYBRD1	2q31.1	3.08718	0.0416967	NEG
212636_at	quaking homolog, KH domain RNA binding (mouse)	QKI	6q26-q27	3.0808	0.0487403	NEG
212865_s_at	collagen, type XIV, alpha 1 (undulin)	COL14A1	8q23	3.07429	0.00700013	NEG
1558964_at	FAT tumor suppressor homolog 3 (Drosophila)	FAT3	11q14.3	3.04345	0.0484795	NEG
202918_s_at	preimplantation protein 3	MOBKL3	2q33.1	3.04094	0.0513816	POS
201939_at	polo-like kinase 2 (Drosophila)	PLK2	5q12.1-q13.2	3.02382	0.034246	POS
203638_s_at	fibroblast growth factor receptor 2)	FGFR2	10q26	3.01512	0.0277402	NEG
218935_at	EH-domain containing 3	EHD3	2p21	3.00707	0.0185037	NEG
230730_at	sarcoglycan, delta (35kDa dystrophin-associated glycoprotein)	SGCD	5q33-q34	2.99975	0.0468976	NEG
214429_at	myotubularin related protein 6	MTMR6	13q12	2.9986	0.0413254	POS
213059_at	cAMP responsive element binding protein 3-like 1	CREB3L1	11p11.2	2.99495	0.0268041	NEG
216867_s_at	platelet-derived growth factor alpha polypeptide	PDGFA	7p22	2.9746	0.0295206	NEG
224964_s_at	guanine nucleotide binding protein (G protein), gamma 2	GNG2	14q21	2.96458	0.0418348	POS
227481_at	CNKSR family member 3	CNKSR3	6q25.2	2.94605	0.0444911	NEG
204237_at	GULP, engulfment adaptor PTB domain containing 1	GULP1	2q32.3-q33	2.93676	0.023583	NEG
204141_at	tubulin, beta 2	TUBB2A	6p25	2.9291	0.00972947	NEG
202499_s_at	solute carrier family 2 (facilitated glucose transporter), member 3	SLC2A3	12p13.3	2.92753	0.0146971	POS
223393_s_at	zinc finger protein 537	TSHZ3	19q12	2.91574	0.00360784	NEG
218330_s_at	neuron navigator 2	NAV2	11p15.1	2.91313	0.0473337	POS
203140_at	B-cell CLL/lymphoma 6 (zinc finger protein 51)	BCL6	3q27	2.9115	0.0153124	POS
202949_s_at	four and a half LIM domains 2	FHL2	2q12-q14	2.89316	0.022285	NEG
201163_s_at	insulin-like growth factor binding protein 7	IGFBP7	4q12	2.86608	0.0306008	POS
228750_at	Transcribed locus	N/A	N/A	2.82559	0.00845445	NEG
1557080_s_at	Integrin, beta-like 1 (with EGF-like repeat domains)	ITGBL1	13q33	2.82322	0.00370216	NEG
219454_at	EGF-like-domain, multiple 6	EGFL6	Xp22	2.80464	0.0323104	NEG
213139_at	snail homolog 2 (Drosophila)	SNAI2	8q11	2.80458	0.00887558	NEG
201667_at	gap junction protein, alpha 1, 43kDa (connexin 43)	GJA1	6q21-q23.2	2.80241	0.0462198	NEG
222288_at	Similar to CG9996-PA	N/A	N/A	2.79421	0.0445554	NEG
201218_at	C-terminal binding protein 2	CTBP2	10q26.13	2.79291	0.0340558	POS
225664_at	collagen, type XII, alpha 1	COL12A1	6q12-q13	2.77954	0.00831749	NEG
227850_x_at	CDC42 effector protein (Rho GTPase binding) 5	CDC42EP5	19q13.42	2.76933	0.0465743	NEG
213943_at	twist homolog 1	TWIST1	7p21.2	2.76534	0.0314776	POS
230903_s_at	Hypothetical protein INM01	C8orf42	8p23.3	2.76136	0.0588368	NEG
226922_at	RAN binding protein 2	RANBP2	2q12.3	2.76024	0.045505	POS
225275_at	EGF-like repeats and discoidin I-like domains 3	EDIL3	5q14	2.75334	0.0259388	NEG
212850_s_at	low density lipoprotein receptor-related protein 4	LRP4	11p11.2-p12	2.74135	0.0314447	NEG
226279_at	protease, serine, 23	PRSS23	11q14.1	2.73611	0.0463604	NEG
206869_at	chondroadherin	CHAD	17q21.33	2.70265	0.0112233	NEG
228249_at	HEPIS	C11orf74	11p12	2.70009	0.0482651	NEG
222162_s_at	a disintegrin-like and metalloprotease	ADAMTS1	21q21.2	2.6983	0.0444908	NEG
214175_x_at	PDZ and LIM domain 4	PDLIM4	5q31.1	2.69593	0.0286074	NEG
228188_at	FOS-like antigen 2	FOSL2	2p23.3	2.69575	0.0240015	POS
235419_at	Transcribed locus	N/A	N/A	2.69286	0.0227482	NEG
207826_s_at	inhibitor of DNA binding 3, dominant negative helix-loop-helix protein	ID3	1p36.13-p36.12	2.6888	0.0478229	NEG
201579_at	FAT tumor suppressor homolog 1 (Drosophila)	FAT	4q35	2.68458	0.0347838	POS
227750_at	kalirin, RhoGEF kinase	KALRN	3q21.1-q21.2	2.68062	0.0404948	POS
203325_s_at	collagen, type V, alpha 1	COL5A1	9q34.2-q34.3	2.6753	0.00734796	NEG
221009_s_at	angiopoietin-like 4	ANGPTL4	19p13.3	2.66824	0.0330411	NEG
231546_at	Hypothetical protein MGC45780	N/A	N/A	2.66586	0.0240557	NEG
230596_at	CDNA FLJ39261 fis, clone OCBBF2009391	N/A	N/A	2.63887	0.0466439	NEG
227610_at	Similar to Peptidylprolyl isomerase A, isoform 1	TSPAN11	12p11.21	2.63619	0.0159857	NEG
212423_at	chromosome 10 open reading frame 56	C10orf56	10q22.3	2.63195	0.0258474	NEG
204451_at	frizzled homolog 1 (Drosophila)	FZD1	7q21	2.63156	0.0370595	POS
202464_s_at	6-phosphofructo-2-kinase/fructose-2,6-biphosphatase 3	PFKFB3	10p14-p15	2.63051	0.037061	POS
228407_at	signal peptide, CUB domain, EGF-like 3	SCUBE3	6p21.3	2.62739	0.000785416	NEG
228653_at	Similar to RIKEN cDNA E130306M17 gene	SAMD5	6q24.3	2.62591	0.0433498	NEG
221563_at	dual specificity phosphatase 10	DUSP10	1q41	2.62045	0.0261401	NEG
201645_at	tenascin C (hexabrachion)	TNC	9q33	2.61457	0.0485306	NEG
210302_s_at	mab-21-like 2 (C. elegans)	MAB21L2	4q31	2.61431	0.0143387	NEG
224793_s_at	transforming growth factor, beta receptor I	TGFBR1	9q22	2.61223	0.0511925	POS
37408_at	mannose receptor, C type 2	MRC2	17q23.2	2.61109	0.0182443	POS
225975_at	protocadherin 18	PCDH18	4q31	2.6008	0.0188808	POS
236179_at	Cadherin 11, type 2, OB-cadherin (osteoblast)	N/A	N/A	2.58478	0.0477985	NEG
206796_at	WNT1 inducible signaling pathway protein 1	WISP1	8q24.1-q24.3	2.58404	0.0417983	NEG
217165_x_at	metallothionein 1F (functional)	MT1F	16q13	2.58149	0.0451719	NEG
222853_at	fibronectin leucine rich transmembrane protein 3	FLRT3	20p11	2.56655	0.0130942	NEG
224694_at	anthrax toxin receptor 1	ANTXR1	2p13.1	2.56387	0.0451199	POS
223395_at	ABI gene family, member 3 (NESH) binding protein	ABI3BP	3q12	2.56104	0.0475438	NEG
36711_at	v-maf musculoaponeurotic fibrosarcoma oncogene homolog F (avian)	MAFF	22q13.1	2.55958	0.017763	POS
203355_s_at	pleckstrin and Sec7 domain containing 3	PSD3	8pter-p23.3	2.55638	0.0482708	POS
201473_at	jun B proto-oncogene	JUNB	19p13.2	2.54596	0.00423046	POS
244740_at	hypothetical protein MGC9913	MGC9913	19q13.43	2.54225	0.0211026	NEG
210319_x_at	msh homeo box homolog 2 (Drosophila)	MSX2	5q34-q35	2.5403	0.0156619	NEG
225867_at	slit-like 2 (Drosophila)	VASN	16p13.3	2.54028	0.029486	NEG
225566_at	neuropilin 2	NRP2	2q33.3	2.53429	0.0377622	NEG
222899_at	integrin, alpha 11	ITGA11	15q23	2.52634	0.00269699	NEG
213169_at	Clone TUA8 Cri-du-chat region mRNA	SEMA5A	5p15.2	2.50971	0.0436267	POS
227870_at	likely ortholog of mouse neighbor of Punc E11	NOPE	15q22.31	2.50824	0.0437828	NEG
223854_at	protocadherin beta 10	PCDHB10	5q31	2.50324	0.00996769	NEG
241698_at	chromosome 2 open reading frame 11	RFTN2	2q33.1	2.5011	0.0496953	NEG
229088_at	Transcribed locus, moderately similar to NP_872301	N/A	N/A	2.49874	0.0143867	NEG
225785_at	chromosome 10 open reading frame 74	REEP3	10q21.3	2.48726	0.0512562	POS
204619_s_at	chondroitin sulfate proteoglycan 2 (versican)	VCAN	5q14.3	2.47232	0.00867935	NEG
213905_x_at	biglycan /// serologically defined colon cancer antigen 33	BGN	Xq28	2.47042	0.0347484	NEG
213348_at	Cyclin-dependent kinase inhibitor 1C (p57, Kip2)	CDKN1C	11p15.5	2.45415	0.0429884	NEG
226043_at	G-protein signalling modulator 1 (AGS3-like, C. elegans)	GPSM1	9q34.3	2.45197	0.0433197	NEG
232201_at	naked cuticle homolog 2 (Drosophila)	NKD2	5p15.3	2.44495	0.00248565	NEG
225688_s_at	pleckstrin homology-like domain, family B, member 2	PHLDB2	3q13.2	2.43404	0.0461929	POS
211962_s_at	zinc finger protein 36, C3H type-like 1	ZFP36L1	14q22-q24	2.42223	0.0369131	POS
212233_at	Microtubule-associated protein 1B	MAP1B	5q13	2.40447	0.0358216	NEG
225242_s_at	steroid sensitive gene 1	CCDC80	3q13.2	2.40275	0.0217092	NEG
203131_at	platelet-derived growth factor receptor, alpha polypeptide	PDGFRA	4q11-q13	2.39918	0.0113943	NEG
238623_at	Mitogen-activated protein kinase kinase kinase 4	N/A	N/A	2.39544	0.0335487	NEG
203394_s_at	hairy and enhancer of split 1, (Drosophila)	HES1	3q28-q29	2.3936	0.0402984	NEG
221748_s_at	tensin 1 /// tensin 1	TNS1	2q35-q36	2.39139	0.0397508	NEG
202270_at	guanylate binding protein 1, interferon-inducible, 67kDa	GBP1	1p22.2	2.38139	0.0271565	POS
211456_x_at	Similar to 60S ribosomal protein L35	MT1P2	1q43	2.37832	0.00214921	POS
238447_at	RNA binding motif, single stranded interacting protein	RBMS3	3p24-p23	2.3777	0.0115371	NEG
226145_s_at	Fraser syndrome 1	FRAS1	4q21.21	2.37683	0.0125174	NEG
228231_at	Nudix (nucleoside diphosphate linked moiety X)-type motif 1	N/A	N/A	2.37386	0.0129267	NEG
205618_at	proline rich Gla (G-carboxyglutamic acid) 1	PRRG1	Xp21.1	2.37001	0.0281245	NEG
242794_at	mastermind-like 3 (Drosophila)	MAML3	4q28	2.36635	0.0127612	NEG
213909_at	leucine rich repeat containing 15	LRRC15	3q29	2.3646	0.0228238	NEG
212077_at	caldesmon 1	CALD1	7q33	2.36052	0.0353909	POS
226822_at	storkhead box 2	STOX2	4q35.1	2.35904	0.00983155	NEG
224937_at	prostaglandin F2 receptor negative regulator	PTGFRN	1p13.1	2.34767	0.0161705	NEG
214297_at	Chondroitin sulfate proteoglycan 4 (melanoma-associated)	CSPG4	15q24.2	2.3468	0.00552391	NEG
221900_at	collagen, type VIII, alpha 2	COL8A2	1p34.2	2.33749	0.0326119	NEG
214807_at	MRNA; cDNA DKFZp564O0862 (from clone DKFZp564O0862)	N/A	N/A	2.33337	0.0151997	NEG
223316_at	coiled-coil domain containing 3	CCDC3	10p13	2.33176	0.00996241	NEG
228974_at	Zinc finger protein 677	ZNF677	N/A	2.3267	0.0347977	NEG
222455_s_at	parvin, alpha	PARVA	11p15.3	2.32586	0.0440884	NEG
227029_at	chromosome 14 open reading frame 24	C14orf24	14q13.2	2.32373	0.0256843	NEG
226769_at	similar to RIKEN cDNA 1110018M03	FIBIN	11p14.2	2.31448	0.0160672	NEG
204114_at	nidogen 2 (osteonidogen)	NID2	14q21-q22	2.30356	0.0481847	NEG
223330_s_at	SGT1, suppressor of G2 allele of SKP1 (S. cerevisiae)	SUGT1	13q14.3	2.30268	0.0180907	NEG
213422_s_at	matrix-remodelling associated 8	LOC727882, MXRA8	1p36.33	2.29633	0.00535006	NEG
235471_at	Chromosome 10 open reading frame 72	C10orf72	10q11.22	2.29559	0.00182123	NEG
212624_s_at	chimerin (chimaerin) 1	CHN1	2q31-q32.1	2.29254	0.0506861	NEG
228570_at	BTB (POZ) domain containing 11	BTBD11	12q23.3	2.28934	0.0490642	NEG
227045_at	zinc finger protein 614	ZNF614	19q13.33	2.28908	0.0213447	NEG
230440_at	zinc finger protein 469	ZNF469	16q24	2.28515	0.00781485	NEG
201505_at	laminin, beta 1	LAMB1	7q22	2.28404	0.0325606	NEG
224588_at	X (inactive)-specific transcript	XIST	Xq13.2	2.28102	0.0300214	NEG
228333_at	Full length insert cDNA clone YT94E02	N/A	N/A	2.27771	0.0243354	NEG
217511_at	Kazal-type serine protease inhibitor domain 1	KAZALD1	10q24.31	2.27678	0.0222181	NEG
219489_s_at	nucleoredoxin	NXN	17p13.3	2.27391	0.00671502	NEG
212859_x_at	metallothionein 1E (functional)	MT1E	16q13	2.26775	0.0113412	NEG
215306_at	TFIIA-alpha/beta-like factor	N/A	N/A	2.26542	0.0402679	NEG
202620_s_at	procollagen-lysine, 2-oxoglutarate 5-dioxygenase 2	PLOD2	3q23-q24	2.2596	0.0511184	POS
209960_at	hepatocyte growth factor (hepapoietin A; scatter factor)	HGF	7q21.1	2.25729	0.0482	POS
212473_s_at	microtubule associated monoxygenase, calponin and LIM domain containing 2	MICAL2	11p15.3	2.25542	0.0115198	NEG
212848_s_at	chromosome 9 open reading frame 3	C9orf3	9q22.32	2.25497	0.0039701	NEG
201108_s_at	thrombospondin 1	THBS1	15q15	2.25371	0.00228783	NEG
201116_s_at	carboxypeptidase E	CPE	4q32.3	2.25173	0.025226	NEG
228708_at	RAB27B, member RAS oncogene family	RAB27B	18q21.2	2.24432	0.0477028	POS
208096_s_at	collagen, type XXI, alpha 1 /// collagen, type XXI, alpha 1	COL21A1	6p12.3-p11.2|6p12.3-p11.2	2.24206	0.0144865	NEG
1556114_a_at	DKFZp451A211 protein	DKFZp451A211	13q34	2.23992	0.0423349	NEG
200897_s_at	palladin	PALLD	4q32.3	2.23709	0.0196722	POS
40560_at	T-box 2	TBX2	17q23	2.23491	0.0266565	NEG
206025_s_at	tumor necrosis factor, alpha-induced protein 6	TNFAIP6	2q23.3	2.23286	0.0404331	NEG
222101_s_at	dachsous 1 (Drosophila)	DCHS1	11p15.4	2.22852	0.0178487	NEG
227812_at	tumor necrosis factor receptor superfamily, member 19	TNFRSF19	13q12.11-q12.3	2.22241	0.012391	NEG
210139_s_at	peripheral myelin protein 22	PMP22	17p12-p11.2	2.22123	0.021705	NEG
212761_at	transcription factor 7-like 2 (T-cell specific, HMG-box)	TCF7L2	10q25.3	2.22102	0.036186	NEG
202238_s_at	nicotinamide N-methyltransferase	NNMT	11q23.1	2.21273	0.0333212	NEG
218967_s_at	phosphotriesterase related	PTER	10p12	2.21228	0.0597613	POS
201810_s_at	SH3-domain binding protein 5 (BTK-associated)	SH3BP5	3p24.3	2.2115	0.015054	POS
203060_s_at	3'-phosphoadenosine 5'-phosphosulfate synthase 2	PAPSS2	10q23-q24	2.20762	0.0242327	POS
214651_s_at	homeo box A9	HOXA9	7p15-p14	2.20701	0.0341958	NEG
206580_s_at	EGF-containing fibulin-like extracellular matrix protein 2	EFEMP2	11q13	2.20632	0.0303727	POS
243946_at	---	N/A	N/A	2.20561	0.035684	NEG
208581_x_at	metallothionein 1X	MT1X	16q13	2.20384	0.0250122	POS
233647_s_at	cytidine and dCMP deaminase domain containing 1	CDADC1	13q14.2	2.20205	0.0188815	POS
209242_at	paternally expressed 3	PEG3	19q13.4	2.20183	0.0440617	NEG
222317_at	Phosphodiesterase 3B, cGMP-inhibited	PDE3B	11p15.1	2.20135	0.000813336	NEG
215017_s_at	formin binding protein 1-like	FNBP1L	1p22.1	2.2004	0.0137424	POS
221786_at	chromosome 6 open reading frame 120	C6orf120	6q27	2.19924	0.0207097	POS
232113_at	Hypothetical gene supported by BX647608	N/A	N/A	2.18693	0.00686261	NEG
226370_at	kelch-like 15 (Drosophila)	KLHL15	Xp22.1-p21	2.18591	0.0299024	POS
209101_at	connective tissue growth factor	CTGF	6q23.1	2.18042	0.0435092	NEG
226571_s_at	Protein tyrosine phosphatase, receptor type, S	PTPRS	19p13.3	2.17866	0.0245544	NEG
205935_at	forkhead box F1	FOXF1	16q24	2.17585	0.0271367	NEG
219427_at	FAT tumor suppressor homolog 4 (Drosophila)	FAT4	4q28.1	2.17295	0.0321758	NEG
211161_s_at	collagen, type III, alpha 1	COL3A1	2q31	2.17266	0.0352363	NEG
235733_at	Transcribed locus, weakly similar to NP_872301	N/A	N/A	2.16256	0.0370045	NEG
58780_s_at	hypothetical protein FLJ10357	FLJ10357	14q11.2	2.16209	0.0217359	NEG
218854_at	squamous cell carcinoma antigen recognized by T cells 2	DSE	6q22	2.16114	0.0457626	NEG
215111_s_at	TSC22 domain family, member 1	TSC22D1	13q14	2.15644	0.0102937	POS
219327_s_at	G protein-coupled receptor, family C, group 5, member C	GPRC5C	17q25	2.15365	0.0100318	POS
210105_s_at	FYN oncogene related to SRC, FGR, YES	FYN	6q21	2.15326	0.00726324	POS
212385_at	Transcription factor 4	TCF4	18q21.1	2.14865	0.0359293	POS
217858_s_at	armadillo repeat containing, X-linked 3	ARMCX3	Xq21.33-q22.2	2.1485	0.04513	POS
213221_s_at	SNF1-like kinase 2	N/A	N/A	2.14812	0.00886139	POS
212845_at	sterile alpha motif domain containing 4	SAMD4A	14q22.2	2.14567	0.0263033	NEG
201110_s_at	thrombospondin 1	THBS1	15q15	2.14559	0.00102627	NEG
225123_at	Sestrin 3	N/A	N/A	2.14535	0.0170584	POS
227278_at	Transcribed locus, moderately similar to XP_512541	N/A	N/A	2.14461	0.0224186	POS
229265_at	Atrophin 1	ATN1	12p13.31	2.14269	0.0256476	POS
213107_at	TRAF2 and NCK interacting kinase	TNIK	3q26.2-q26.31	2.14107	0.0253014	NEG
231807_at	KIAA1217	KIAA1217	10p12.1	2.14097	0.0302039	POS
209289_at	Nuclear factor I/B	NFIB	9p24.1	2.1398	0.00121454	NEG
202756_s_at	glypican 1	GPC1	2q35-q37	2.13869	0.00195178	NEG
204400_at	embryonal Fyn-associated substrate	EFS	14q11.2-q12	2.13678	0.0151868	NEG
201125_s_at	integrin, beta 5	ITGB5	3q21.2	2.13515	0.00560171	NEG
234936_s_at	KIAA1345 protein	CC2D2A	4p15.33	2.1334	0.0489198	NEG
202351_at	integrin, alpha V (vitronectin receptor, alpha polypeptide, antigen CD51)	ITGAV	2q31-q32	2.13267	0.0466534	POS
206327_s_at	cadherin 15, M-cadherin (myotubule)	CDH15	16q24.3	2.13263	0.0254479	NEG
226905_at	hypothetical protein MGC45871	FAM101B	17p13	2.13045	0.0487227	NEG
209120_at	nuclear receptor subfamily 2, group F, member 2	NR2F2	15q26	2.13024	0.0489704	POS
209357_at	Cbp/p300-interacting transactivator, with Glu/Asp-rich carboxy-terminal domain, 2	CITED2	6q23.3	2.12606	0.0240916	POS
216336_x_at	Metallothionein 1K	MT1M	16q13	2.12372	0.0122202	NEG
209656_s_at	transmembrane protein 47	TMEM47	Xp11.4	2.12318	0.00606961	POS
217683_at	Hemoglobin, epsilon 1	HBE1	11p15.5	2.12298	0.00378728	POS
217525_at	olfactomedin-like 1	OLFML1	11p15.4	2.12239	0.0189839	NEG
222457_s_at	epithelial protein lost in neoplasm beta	LIMA1	12q13	2.12151	0.0294839	NEG
210809_s_at	periostin, osteoblast specific factor	POSTN	13q13.3	2.11946	0.0324235	NEG
219218_at	KIAA1447 protein	BAHCC1	17q25.3	2.11716	0.00485072	NEG
236565_s_at	La ribonucleoprotein domain family, member 6	LARP6	15q23	2.11667	0.0303295	POS
200821_at	lysosomal-associated membrane protein 2	LAMP2	Xq24	2.11446	0.00499849	POS
229819_at	alpha-1-B glycoprotein	A1BG	19q13.4	2.11304	0.00148976	POS
202555_s_at	myosin, light polypeptide kinase /// myosin, light polypeptide kinase	MYLK	3q21	2.11243	0.0249282	NEG
204176_at	kelch-like 20 (Drosophila)	KLHL20	1q24.1-q24.3	2.10997	0.0161573	POS
213397_x_at	ribonuclease, RNase A family, 4	RNASE4	14q11.1	2.10871	0.0305454	POS
220975_s_at	C1q and tumor necrosis factor related protein 1	C1QTNF1	17q25.3	2.10743	0.0208475	NEG
212558_at	sprouty homolog 1, antagonist of FGF signaling (Drosophila)	SPRY1	4q28.1	2.1063	0.0310703	POS
226824_at	carboxypeptidase X (M14 family), member 2	CPXM2	10q26.13	2.10535	0.0261069	NEG
226705_at	Fibroblast growth factor receptor 1	FGFR1	8p11.2-p11.1	2.10269	0.00323152	POS
1560434_x_at	Clathrin, light polypeptide (Lca) /// Similar to HMG-4, HMG-2a	CLTA	9p13	2.10197	0.00256803	NEG
218820_at	chromosome 14 open reading frame 132	C14orf132	14q32.2	2.09647	0.0133065	NEG
244334_at	translocation associated membrane protein 1-like 1	TRAM1L1	4q26	2.09524	0.0465213	NEG
64942_at	G protein-coupled receptor 153	GPR153	1p36.31	2.09363	0.031931	NEG
227013_at	LATS, large tumor suppressor, homolog 2 (Drosophila)	LATS2	13q11-q12	2.0927	0.0108135	POS
205203_at	phospholipase D1, phophatidylcholine-specific	PLD1	3q26	2.09254	0.0183937	NEG
207724_s_at	spastin	SPAST	2p24-p21	2.09128	0.000513834	POS
225008_at	Hypothetical protein MGC34646	N/A	N/A	2.09089	0.017649	NEG
225188_at	Ras association (RalGDS/AF-6) and pleckstrin homology domains 1	RAPH1	2q33	2.08957	0.0323377	NEG
212094_at	paternally expressed 10	PEG10	7q21	2.08949	0.00409412	POS
226342_at	Spectrin, beta, non-erythrocytic 1	SPTBN1	2p21	2.08842	0.00773172	NEG
230071_at	Septin 11	40067	4q21.1	2.0874	0.00278914	NEG
225060_at	low density lipoprotein receptor-related protein 11	LRP11	6q25.1	2.08538	0.0177141	POS
229178_at	hypothetical protein LOC145786	LOC145786	15q21.1	2.08484	0.0407757	NEG
223028_s_at	sorting nexin 9	SNX9	6q25.1-q26	2.08354	0.000953955	POS
209596_at	matrix-remodelling associated 5	MXRA5	Xp22.33	2.0831	0.0044696	NEG
222258_s_at	SH3-domain binding protein 4	SH3BP4	2q37.1-q37.2	2.08057	0.0286044	POS
200785_s_at	low density lipoprotein-related protein 1 (alpha-2-macroglobulin receptor)	LRP1	12q13-q14	2.08029	0.00353311	POS
225662_at	sterile alpha motif and leucine zipper containing kinase AZK	ZAK	2q24.2	2.07992	0.0239075	NEG
218862_at	ankyrin repeat and SOCS box-containing 13	ASB13	10p15.1	2.07854	0.0191211	POS
226884_at	leucine rich repeat neuronal 1	LRRN1	3p26.2	2.07847	0.00799346	POS
228181_at	solute carrier family 30 (zinc transporter), member 1	SLC30A1	1q32-q41	2.07664	0.0368381	POS
212566_at	microtubule-associated protein 4	MAP4	3p21	2.07347	0.0309193	POS
230972_at	ankyrin repeat domain 9	ANKRD9	14q32.31	2.07325	0.0217617	NEG
224604_at	HCV F-transactivated protein 1	LOC401152	4q26	2.07251	0.0395851	POS
205896_at	solute carrier family 22 (organic cation transporter), member 4	SLC22A4	5q31.1	2.06948	0.00581134	NEG
200635_s_at	protein tyrosine phosphatase, receptor type, F	PTPRF	1p34	2.0642	0.0449327	NEG
229492_at	Vang-like 1 (van gogh, Drosophila)	VANGL1	1p11-p13.1	2.06408	0.0424794	NEG
228843_at	CDNA FLJ43087 fis, clone BRTHA3019105	N/A	N/A	2.05615	0.0167441	NEG
220014_at	mesenchymal stem cell protein DSC54	PRR16	5q23.1	2.05506	0.0405894	NEG
226621_at	Oncostatin M receptor	N/A	N/A	2.05442	0.0393851	NEG
201069_at	matrix metalloproteinase 2	MMP2	16q13-q21	2.05077	0.0167064	NEG
242051_at	Transcribed locus	N/A	N/A	2.04992	0.0104579	NEG
205572_at	angiopoietin 2	ANGPT2	8p23.1	2.04962	0.0459437	NEG
37005_at	neuroblastoma, suppression of tumorigenicity 1	NBL1	1p36.13-p36.11	2.04716	0.00401372	NEG
227099_s_at	hypothetical LOC387763	LOC387763	11p11.2	2.04311	0.0359019	POS
37152_at	peroxisome proliferative activated receptor, delta	PPARD	6p21.2-p21.1	2.04258	0.0245005	POS
213790_at	A disintegrin and metalloproteinase domain 12 (meltrin alpha)	N/A	N/A	2.03903	0.0278974	NEG
229657_at	thyroid hormone receptor, beta	THRB	3p24.2	2.03728	0.00109697	NEG
204358_s_at	fibronectin leucine rich transmembrane protein 2	FLRT2	14q24-q32	2.03659	0.0128324	NEG
222379_at	Potassium voltage-gated channel, Isk-related family, member 4	KCNE4	2q36.3	2.03456	0.0310699	NEG
227534_at	chromosome 9 open reading frame 21	C9orf21	9q22.32	2.03415	0.0370052	POS
201438_at	collagen, type VI, alpha 3	COL6A3	2q37	2.03367	0.0252505	NEG
200673_at	lysosomal-associated protein transmembrane 4 alpha	LAPTM4A	2p24.1	2.03261	0.0419102	POS
205609_at	angiopoietin 1	ANGPT1	8q22.3-q23	2.03203	0.00732739	NEG
209568_s_at	ral guanine nucleotide dissociation stimulator-like 1	RGL1	1q25.3	2.02988	0.000741368	POS
229638_at	iroquois homeobox protein 3	IRX3	16q12.2	2.02784	0.0148765	NEG
203542_s_at	Kruppel-like factor 9	KLF9	9q13	2.02779	0.00268365	POS
205383_s_at	zinc finger and BTB domain containing 20	ZBTB20	3q13.2	2.0261	0.0410804	POS
204570_at	cytochrome c oxidase subunit VIIa polypeptide 1 (muscle)	COX7A1	19q13.1	2.02581	0.0347637	NEG
210946_at	phosphatidic acid phosphatase type 2A	PPAP2A	5q11	2.02547	0.0283248	POS
204140_at	tyrosylprotein sulfotransferase 1	TPST1	7q11.21	2.0229	0.00927704	POS
208003_s_at	nuclear factor of activated T-cells 5, tonicity-responsive	NFAT5	16q22.1	2.0209	0.0357438	NEG
232080_at	HECT, C2 and WW domain containing E3 ubiquitin protein ligase 2	HECW2	2q32.3-q33.1	2.02005	0.031554	NEG
224387_at	COMM domain containing 5 /// COMM domain containing 5	COMMD5	8q24-qter	2.01721	0.0421895	POS
239349_at	C1q and tumor necrosis factor related protein 7	C1QTNF7	4p16-p15	2.017	0.00790067	NEG
230075_at	RAB39B, member RAS oncogene family	RAB39B	Xq28	2.01682	0.0179005	POS
214434_at	heat shock 70kDa protein 12A	HSPA12A	10q26.12	2.0149	0.0264998	NEG
213428_s_at	collagen, type VI, alpha 1	COL6A1	21q22.3	2.01438	0.00103033	NEG
212294_at	guanine nucleotide binding protein (G protein), gamma 12	GNG12	1p31.3	2.01415	0.00990232	NEG
212504_at	KIAA0934	DIP2C	10p15.3	2.01112	0.0195793	NEG
224710_at	RAB34, member RAS oncogene family	RAB34	17q11.2	2.01066	0.00136017	NEG
213455_at	Hypothetical protein BC001096	FAM114A1	4p14	2.00982	0.0474555	POS
236656_s_at	Full length insert cDNA YI37C01	N/A	N/A	2.00758	0.00141815	NEG
209897_s_at	slit homolog 2 (Drosophila)	SLIT2	4p15.2	2.00623	0.0117868	NEG
228121_at	Transforming growth factor, beta 2	TGFbeta 2	N/A	2.00104	0.000215693	POS
212843_at	neural cell adhesion molecule 1	NCAM1	11q23.1	1.99282	0.0428007	POS
212928_at	TSPY-like 4	TSPYL4	6q22.1	1.99085	0.00489953	POS
220248_x_at	NSFL1 (p97) cofactor (p47)	NSFL1C	20p13	0.515751	0.0972075	POS
235359_at	leucine rich repeat containing 33	LRRC33	3q29	0.499862	0.017764	POS
227907_at	Tumor protein p53 binding protein, 1	N/A	N/A	0.499861	0.0278641	POS
200787_s_at	phosphoprotein enriched in astrocytes 15	PEA15	1q21.1	0.49972	0.00799887	POS
225294_s_at	trafficking protein particle complex 1	TRAPPC1	17p13.1	0.499692	0.0285634	POS
225577_at	HLA complex group 18	HCG18	6p21.3	0.49914	0.00159344	POS
233013_x_at	ribosomal protein L7-like 1 /// similar to RPL7L1 protein	LOC220906	10p12.1	0.498857	0.000349743	POS
226202_at	zinc finger protein 398	ZNF398	7q36.1	0.498676	0.0454941	POS
206420_at	immunoglobulin superfamily, member 6	IGSF6	16p12-p13	0.498386	0.00567566	NEG
212277_at	myotubularin related protein 4	MTMR4	17q22-q23	0.497663	0.00753898	POS
227432_s_at	Insulin receptor	N/A	N/A	0.497501	0.0542473	POS
204599_s_at	mitochondrial ribosomal protein L28	MRPL28	16p13.3	0.497468	0.00996522	POS
222104_x_at	general transcription factor IIH, polypeptide 3, 34kDa	N/A	N/A	0.497351	0.00112704	POS
201161_s_at	cold shock domain protein A	CSDA	12p13.1	0.497096	0.00363637	POS
210424_s_at	88-kDa golgi protein /// golgin-67	GOLGA8A, GOLGA8B	15q11.2, 15q14	0.496545	0.0265699	POS
225382_at	zinc finger protein 275	ZNF275	Xq28	0.496366	0.0190545	POS
219956_at	UDP-N-acetyl-alpha-D-galactosamine:polypeptide N-acetylgalactosaminyltransferase 6	GALNT6	12q13	0.49587	0.0403267	POS
210570_x_at	mitogen-activated protein kinase 9	MAPK9	5q35	0.495795	0.0147848	POS
210829_s_at	single-stranded DNA binding protein 2	SSBP2	5q14.1	0.495578	0.00680184	POS
211073_x_at	ribosomal protein L3 /// ribosomal protein L3	RPL3	22q13	0.495553	0.00177273	POS
211563_s_at	chromosome 19 open reading frame 2	C19orf2	19q12	0.495486	0.00508124	POS
226640_at	KCCR13L	DAGLB	7p22.1	0.494895	0.0403938	POS
209630_s_at	F-box and WD-40 domain protein 2	FBXW2	9q34	0.494829	0.0177492	POS
229058_at	ankyrin repeat domain 16	ANKRD16	10p15.1	0.494741	0.000939513	POS
209092_s_at	chromosome 17 open reading frame 25	GLOD4	17p13.3	0.49474	0.0090366	POS
211948_x_at	BAT2 domain containing 1	BAT2D1	1q23.3	0.494421	0.00496462	POS
226611_s_at	proline rich 6	PRR6	17p11.2	0.494395	0.0129513	POS
203471_s_at	pleckstrin	PLEK	2p14	0.494312	0.0195023	POS
220251_at	chromosome 1 open reading frame 107	C1orf107	1q32.2	0.494126	0.00454685	POS
212662_at	poliovirus receptor	PVR	19q13.2	0.493956	0.0291181	NEG
212057_at	KIAA0182 protein	KIAA0182	16q24.1	0.493873	0.00125358	POS
220690_s_at	DKFZP566O084 protein	DHRS7B	17p12	0.493509	0.0394585	POS
210765_at	CSE1 chromosome segregation 1-like (yeast)	CSE1L	20q13	0.493431	0.0123194	NEG
215023_s_at	peroxisome biogenesis factor 1	PEX1	7q21.2	0.493224	0.0334199	POS
1565484_x_at	epidermal growth factor receptor (erythroblastic leukemia viral (v-erb-b) oncogene homolog, avian)	EGFR	7p12	0.493143	0.0359069	POS
202803_s_at	integrin, beta 2 (CD18)	ITGB2	21q22.3	0.492824	0.0302985	NEG
229332_at	glyoxalase domain containing 1	HPDL	1p34.1	0.492465	0.0121753	POS
206687_s_at	protein tyrosine phosphatase, non-receptor type 6	PTPN6	12p13	0.491858	0.00329752	POS
200936_at	ribosomal protein L8	RPL8	8q24.3	0.491311	0.0284164	POS
222900_at	Nuclear receptor interacting protein 3	N/A	N/A	0.491265	0.0102711	NEG
219647_at	popeye domain containing 2	POPDC2	3q13.33	0.491219	0.00419784	NEG
200751_s_at	heterogeneous nuclear ribonucleoprotein C (C1/C2)	HNRNPC	14q11.2	0.491208	0.0142055	POS
219079_at	cytochrome b5 reductase 4	CYB5R4	6pter-q22.33	0.491155	0.0041491	POS
60815_at	hypothetical protein MGC13098	POLR2J4	7p13	0.490957	0.0360484	NEG
235295_at	Pannexin 1	N/A	N/A	0.490457	0.00246148	POS
202897_at	protein tyrosine phosphatase, non-receptor type substrate 1	SIRPA	20p13	0.490429	0.0155756	POS
212515_s_at	DEAD (Asp-Glu-Ala-Asp) box polypeptide 3, X-linked	DDX3X	Xp11.3-p11.23	0.490264	0.00744013	POS
214486_x_at	CASP8 and FADD-like apoptosis regulator	CFLAR	2q33-q34	0.490061	0.0181814	POS
200041_s_at	HLA-B associated transcript 1 /// HLA-B associated transcript 1	BAT1	6p21.3	0.490018	0.0427839	POS
201554_x_at	glycogenin	GYG1	3q24-q25.1	0.490006	0.00741719	POS
201478_s_at	dyskeratosis congenita 1, dyskerin	DKC1	Xq28	0.489891	0.0166729	POS
220085_at	helicase, lymphoid-specific	HELLS	10q24.2	0.48976	0.0486086	POS
208777_s_at	proteasome (prosome, macropain) 26S subunit, non-ATPase, 11	PSMD11	17q11.2	0.489686	0.00918141	POS
210926_at	actin-like protein	FKSG30	2q21.1	0.489623	0.0146976	POS
209316_s_at	HBS1-like (S. cerevisiae)	HBS1L	6q23-q24	0.489518	0.0448528	POS
213488_at	sushi, nidogen and EGF-like domains 1	SNED1	2q37.3	0.488611	0.00808283	NEG
202583_s_at	RAN binding protein 9	RANBP9	6p23	0.488057	0.0394017	POS
1552617_a_at	ring finger and WD repeat domain 2	RFWD2	1q25.1-q25.2	0.487809	0.0129422	POS
211318_s_at	RAE1 RNA export 1 homolog (S. pombe)	RAE1	20q13.31	0.487716	0.00979237	POS
215445_x_at	Clone 23605 mRNA sequence	N/A	N/A	0.487413	0.00904622	NEG
212167_s_at	SWI/SNF related, matrix associated, actin dependent regulator of chromatin, subfamily b, member 1	SMARCB1	22q11.23|22q11	0.486769	0.00775305	POS
218456_at	C1q domain containing 1	CAPRIN2	12p11	0.486544	0.0221539	POS
227473_at	Cortactin	N/A	N/A	0.486386	0.0274431	POS
209129_at	thyroid hormone receptor interactor 6	TRIP6	7q22	0.486216	0.0175572	POS
218120_s_at	heme oxygenase (decycling) 2	HMOX2	16p13.3	0.485968	0.0101384	POS
212228_s_at	chromosome 16 open reading frame 49	COQ9	16q13	0.48591	0.0295773	POS
203979_at	cytochrome P450, family 27, subfamily A, polypeptide 1	CYP27A1	2q33-qter	0.485806	0.0375968	NEG
207396_s_at	asparagine-linked glycosylation 3 homolog (yeast, alpha-1,3-mannosyltransferase)	ALG3	3q27.1	0.485749	0.0277217	POS
201422_at	interferon, gamma-inducible protein 30	IFI30	19p13.1	0.485109	0.00638273	POS
1554482_a_at	SAR1a gene homolog 2 (S. cerevisiae)	SAR1B	5q31.1	0.484844	0.0423408	POS
218664_at	mitochondrial trans-2-enoyl-CoA reductase	MECR	1p36.1-p35.1	0.483709	0.0200487	POS
209395_at	chitinase 3-like 1 (cartilage glycoprotein-39)	CHI3L1	1q32.1	0.483397	0.0170488	NEG
206214_at	phospholipase A2, group VII (platelet-activating factor acetylhydrolase, plasma)	PLA2G7	6p21.2-p12	0.483312	0.046177	NEG
201475_x_at	methionine-tRNA synthetase	MARS	12q13.2	0.483048	0.00710984	POS
233378_at	RUN and FYVE domain containing 1	LOC731419	N/A	0.482675	0.0114706	POS
223054_at	DnaJ (Hsp40) homolog, subfamily B, member 11	DNAJB11	3q27.3	0.482134	0.00737919	POS
206493_at	integrin, alpha 2b (platelet glycoprotein IIb of IIb/IIIa complex, antigen CD41B)	ITGA2B	17q21.32	0.481912	0.00535998	NEG
225739_at	RAB11 family interacting protein 4 (class II)	RAB11FIP4	N/A	0.481822	0.0429517	POS
226818_at	macrophage expressed gene 1	MPEG1	11q12.1	0.481724	0.0221856	NEG
206468_s_at	KIAA0859	KIAA0859	1q24-q25.3	0.481297	0.002738	POS
227658_s_at	pleckstrin homology domain containing, family A (phosphoinositide binding specific) member 3	PLEKHA3	2q31.2	0.481105	0.00217281	POS
206471_s_at	plexin C1	PLXNC1	12q23.3	0.481091	0.00503633	POS
201950_x_at	capping protein (actin filament) muscle Z-line, beta	CAPZB	1p36.1	0.480605	0.0160925	POS
201774_s_at	chromosome condensation-related SMC-associated protein 1	NCAPD2	12p13.3	0.480462	0.0213164	POS
211015_s_at	heat shock 70kDa protein 4	HSPA4	5q31.1-q31.2	0.480303	0.0110296	POS
217221_x_at	RNA binding motif protein 10	RBM10	Xp11.23	0.480209	0.0426276	POS
202899_s_at	splicing factor, arginine/serine-rich 3	SFRS3	6p21	0.480171	0.0173549	POS
1559204_x_at	v-Ki-ras2 Kirsten rat sarcoma viral oncogene homolog	KRAS	12p12.1	0.479845	0.00300186	POS
214813_at	zinc finger protein 75 (D8C6)	ZNF75	Xq26.3	0.479695	0.0121013	POS
204602_at	dickkopf homolog 1 (Xenopus laevis)	DKK1	10q11.2	0.479466	0.0466299	POS
244462_at	Full-length cDNA clone CS0DF033YJ19 of Fetal brain of Homo sapiens (human)	ZNF224	19q13.2	0.478586	0.0166163	POS
222452_s_at	GC-rich promoter binding protein 1-like 1	GPBP1L1	1p34.1	0.478325	0.0191015	POS
202974_at	membrane protein, palmitoylated 1, 55kDa	MPP1	Xq28	0.478074	0.0121774	POS
204367_at	Sp2 transcription factor	SP2	17q21.32	0.47783	0.00530238	POS
225483_at	hypothetical protein MGC10485	VPS26B	11q25	0.477652	0.0319604	POS
202953_at	complement component 1, q subcomponent, beta polypeptide	C1QB	1p36.12	0.477571	0.031462	NEG
211289_x_at	cell division cycle 2-like 1 (PITSLRE proteins) /// cell division cycle 2-like 2 (PITSLRE proteins)	CDC2L1, CDC2L2	1p36.33	0.477258	0.0417724	POS
209239_at	nuclear factor of kappa light polypeptide gene enhancer in B-cells 1 (p105)	NFKB1	4q24	0.477199	0.00647528	POS
201710_at	v-myb myeloblastosis viral oncogene homolog (avian)-like 2	MYBL2	20q13.1	0.476727	0.0126036	POS
1557370_s_at	MYC binding protein 2	MYCBP2	13q22	0.476705	0.0300488	POS
210830_s_at	paraoxonase 2	PON2	7q21.3	0.476686	0.0260934	POS
203319_s_at	zinc finger protein 148 (pHZ-52)	ZNF148	3q21	0.476303	0.0188091	POS
223135_s_at	bobby sox homolog (Drosophila)	BBX	3q13.1	0.476161	0.00385027	POS
202802_at	deoxyhypusine synthase	DHPS	19p13.2-p13.1	0.475736	0.0179764	POS
218420_s_at	chromosome 13 open reading frame 23	C13orf23	13q13.3	0.475725	0.0026456	POS
219413_at	acyl-Coenzyme A binding domain containing 4	ACBD4	17q21.31	0.475602	0.0354951	POS
210573_s_at	polymerase (RNA) III (DNA directed) polypeptide C (62kD)	POLR3C	1q21.1	0.47546	0.0459097	POS
244040_at	Potassium intermediate/small conductance calcium-activated channel, subfamily N, member 3	N/A	N/A	0.475312	0.000975239	POS
212036_s_at	pinin, desmosome associated protein	PNN	14q21.1	0.475099	0.0369744	POS
203195_s_at	nucleoporin 98kDa	NUP98	11p15.5	0.47504	0.0321348	POS
1567458_s_at	ras-related C3 botulinum toxin substrate 1 (rho family, small GTP binding protein Rac1)	RAC1	7p22	0.474515	0.00764082	POS
205903_s_at	potassium intermediate/small conductance calcium-activated channel, subfamily N, member 3	KCNN3	1q21.3	0.47439	0.0355427	POS
202955_s_at	ADP-ribosylation factor guanine nucleotide-exchange factor 1(brefeldin A-inhibited)	ARFGEF1	8q13	0.473664	0.00163557	POS
213820_s_at	START domain containing 5	STARD5	15q26	0.473197	0.0170902	POS
206526_at	RIB43A domain with coiled-coils 2	RIBC2	22q13.31	0.472506	0.00184434	POS
229491_at	hypothetical protein BC009732	NHEDC2	4q24	0.471389	0.00926433	POS
205692_s_at	CD38 antigen (p45)	CD38	4p15	0.47078	0.0458888	POS
205273_s_at	pitrilysin metalloproteinase 1	PITRM1	10p15.2	0.470528	0.0228349	POS
201910_at	FERM, RhoGEF (ARHGEF) and pleckstrin domain protein 1 (chondrocyte-derived)	FARP1	13q32.2	0.470411	0.000218659	POS
1554510_s_at	growth hormone inducible transmembrane protein	GHITM	10q23.1	0.470305	0.0363044	POS
201360_at	cystatin C (amyloid angiopathy and cerebral hemorrhage)	CST3	20p11.21	0.470238	0.0305861	POS
218506_x_at	cytokine-like nuclear factor n-pac	N-PAC	16p13.3	0.470174	0.0149348	POS
222773_s_at	UDP-N-acetyl-alpha-D-galactosamine:polypeptide N-acetylgalactosaminyltransferase 12 (GalNAc-T12)	GALNT12	9q22.33	0.469981	0.018224	POS
216593_s_at	phosphatidylinositol glycan, class C	PIGC	1q23-q25	0.469979	0.0406511	POS
218119_at	translocase of inner mitochondrial membrane 23 homolog (yeast)	TIMM23, TIMM23B	10q11.21-q11.23, 10q11.23	0.469877	0.0221238	POS
223921_s_at	glucosidase, beta (bile acid) 2	GBA2	9p13.3	0.469702	0.00152006	POS
218175_at	limkain beta 2	CCDC92	12q24.31	0.469275	0.0228144	POS
222474_s_at	translocase of outer mitochondrial membrane 22 homolog (yeast)	TOMM22	22q12-q13	0.46917	0.0182861	POS
204714_s_at	coagulation factor V (proaccelerin, labile factor)	F5	1q23	0.469137	0.0023024	NEG
204454_at	leucine zipper, down-regulated in cancer 1	LDOC1	Xq27	0.469129	0.0015263	POS
200918_s_at	signal recognition particle receptor ('docking protein')	SRPR	11q24.3	0.469045	0.0235894	POS
201020_at	tyrosine 3-monooxygenase/tryptophan 5-monooxygenase activation protein, eta polypeptide	YWHAH	22q12.3	0.468877	0.0241206	POS
210754_s_at	v-yes-1 Yamaguchi sarcoma viral related oncogene homolog	LYN	8q13	0.468287	0.00177777	POS
1554351_a_at	TIP41, TOR signalling pathway regulator-like (S. cerevisiae)	TIPRL	1q23.2	0.467613	0.0080317	POS
220980_s_at	ADP-dependent glucokinase /// ADP-dependent glucokinase	ADPGK	15q24.1	0.467395	0.0063396	POS
211316_x_at	CASP8 and FADD-like apoptosis regulator	CFLAR	2q33-q34	0.466823	0.000702079	POS
1555846_a_at	CDNA FLJ39218 fis, clone OCBBF2006660	N/A	N/A	0.466279	0.00275944	POS
222559_s_at	hypothetical protein FLJ10656	P15RS	18q12.2	0.466248	0.0100493	POS
222583_s_at	nucleoporin 50kDa	NUP50	22q13.31	0.466079	0.0340937	POS
231736_x_at	microsomal glutathione S-transferase 1	MGST1	12p12.3-p12.1	0.466077	0.037515	POS
203975_s_at	chromatin assembly factor 1, subunit A (p150)	CHAF1A	19p13.3	0.465721	0.00171132	POS
216899_s_at	src family associated phosphoprotein 2	SKAP2	7p21-p15	0.465284	0.010586	POS
208846_s_at	voltage-dependent anion channel 3	VDAC3	8p11.2	0.464989	0.0119922	POS
202759_s_at	PALM2-AKAP2 protein	AKAP2, PALM2-AKAP2	9q31-q33	0.464977	0.0319904	POS
1559645_at	Non-coding RNA HANC	N/A	N/A	0.464968	0.0291364	NEG
225458_at	DKFZP564I1171 protein	LOC25845	5p15.33	0.464382	0.017434	POS
206959_s_at	UPF3 regulator of nonsense transcripts homolog A (yeast)	UPF3A	13q34	0.464234	0.0491805	POS
203210_s_at	replication factor C (activator 1) 5, 36.5kDa	RFC5	12q24.2-q24.3	0.463979	0.0152655	POS
216387_x_at	similar to nucleophosmin 1; nucleolar phosphoprotein B23; numatrin; nucleophosmin/nucleoplasmin member 1	LOC390411	13q21.33	0.463147	0.0472065	POS
204143_s_at	enolase superfamily member 1	ENOSF1	18p11.32	0.462719	0.0257393	POS
218998_at	hypothetical protein FLJ20457	C9orf6	9q31.3	0.462634	0.0272342	POS
202424_at	mitogen-activated protein kinase kinase 2	MAP2K2	19p13.3	0.462589	0.0192046	POS
210052_s_at	TPX2, microtubule-associated, homolog (Xenopus laevis)	TPX2	20q11.2	0.462566	0.00100684	POS
200079_s_at	lysyl-tRNA synthetase /// lysyl-tRNA synthetase	KARS	16q23-q24	0.46225	0.0233342	POS
223219_s_at	CCR4-NOT transcription complex, subunit 10	CNOT10	3p22.3	0.462184	0.0177042	POS
1553101_a_at	hypothetical protein FLJ20308	ALKBH5	17p11.2	0.46191	0.0425715	POS
202058_s_at	karyopherin alpha 1 (importin alpha 5)	KPNA1	3q21	0.461766	0.00477548	POS
216064_s_at	aspartylglucosaminidase	AGA	4q32-q33	0.461101	0.0174328	POS
211395_x_at	Fc fragment of IgG, low affinity IIc, receptor for (CD32)	FCGR2C	1q23.3	0.460695	0.0412904	POS
228746_s_at	Hypothetical protein H41	CDV3	3q22.1	0.460605	0.0270368	POS
237759_at	CD48 antigen (B-cell membrane protein)	CD48	1q21.3-q22	0.460011	0.00328093	NEG
218400_at	2'-5'-oligoadenylate synthetase 3, 100kDa	OAS3	12q24.2	0.458756	0.041763	POS
221681_s_at	dentin sialophosphoprotein	DSPP	4q21.3	0.458521	0.0293165	NEG
205172_x_at	clathrin, light polypeptide (Lcb)	CLTB	4q2-q3|5q35	0.457766	0.0279799	POS
200806_s_at	heat shock 60kDa protein 1 (chaperonin)	HSPD1	2q33.1	0.45758	0.00618108	POS
237194_at	Tetraspanin 5	N/A	N/A	0.45737	0.0263805	NEG
239106_at	Carbonic anhydrase VB-like	N/A	N/A	0.457317	0.0012762	POS
1554930_a_at	fucosyltransferase 8 (alpha (1,6) fucosyltransferase)	FUT8	14q24.3	0.457265	0.00924756	POS
1552921_a_at	fidgetin-like 1	FIGNL1	7p12.2	0.456612	0.00316638	POS
227414_at	hypothetical protein DKFZp547E052	RHBDD1	2q36.3	0.456399	0.00913084	POS
201469_s_at	SHC (Src homology 2 domain containing) transforming protein 1	SHC1	1q21	0.456367	0.010157	POS
227210_at	Scm-like with four mbt domains 2	N/A	N/A	0.456184	0.00169568	POS
219371_s_at	Kruppel-like factor 2 (lung)	KLF2	19p13.13-p13.11	0.456022	0.0269014	POS
220178_at	chromosome 19 open reading frame 28	C19orf28	19p13.3	0.455455	0.036987	NEG
225915_at	calcium binding protein 39-like	CAB39L	13q14.2	0.455323	0.0223547	NEG
226987_at	RNA binding motif protein 15B	RBM15B	3p21.2	0.454957	0.00600197	POS
215113_s_at	SUMO1/sentrin/SMT3 specific protease 3	SENP3	17p13	0.454673	0.0218657	POS
225700_at	glucocorticoid induced transcript 1	GLCCI1	7p21.3	0.454238	0.00947061	POS
210042_s_at	cathepsin Z	CTSZ	20q13	0.454074	0.034256	POS
215832_x_at	phosphatidylinositol binding clathrin assembly protein	PICALM	11q14	0.453735	0.0134231	POS
205718_at	integrin, beta 7	ITGB7	12q13.13	0.45284	0.0034857	POS
201346_at	adiponectin receptor 2	ADIPOR2	12p13.31	0.452836	0.00547615	POS
208907_s_at	mitochondrial ribosomal protein S18B	MRPS18B	6p21.3	0.45269	0.024522	POS
203392_s_at	C-terminal binding protein 1	CTBP1	4p16	0.452353	0.0185951	POS
212311_at	KIAA0746 protein	KIAA0746	4p15.2	0.45162	0.0228401	POS
217821_s_at	WW domain binding protein 11	WBP11	12p12.3	0.451282	0.000179369	POS
212337_at	hypothetical protein TI-227H	TI-227H, TUG1	22q12.2	0.45099	0.00484422	POS
210667_s_at	chromosome 21 open reading frame 33	C21orf33	21q22.3	0.450967	0.036546	POS
208819_at	RAB8A, member RAS oncogene family	RAB8A	19p13.1	0.450671	0.00205032	POS
208931_s_at	interleukin enhancer binding factor 3, 90kDa	ILF3	19p13.2	0.448577	0.0384172	POS
225802_at	topoisomerase (DNA) I, mitochondrial	TOP1MT	8q24.3	0.448543	0.00607804	POS
215942_s_at	G-2 and S-phase expressed 1	GTSE1	22q13.2-q13.3	0.448265	0.007667	POS
205988_at	CD84 antigen (leukocyte antigen)	CD84	1q24	0.447969	0.0197309	POS
204821_at	butyrophilin, subfamily 3, member A3	BTN3A3	6p21.3	0.447436	0.0193803	POS
200758_s_at	nuclear factor (erythroid-derived 2)-like 1	NFE2L1	17q21.3	0.447325	0.029789	POS
202369_s_at	translocation associated membrane protein 2	TRAM2	6p21.1-p12	0.446347	0.00659762	POS
201089_at	ATPase, H+ transporting, lysosomal 56/58kDa, V1 subunit B, isoform 2	ATP6V1B2	8p22-p21	0.446347	0.0314273	POS
204357_s_at	LIM domain kinase 1	LIMK1	7q11.23	0.446168	0.048572	NEG
202758_s_at	regulatory factor X-associated ankyrin-containing protein	RFXANK	19p12	0.44604	0.0419671	POS
1555427_s_at	synaptotagmin binding, cytoplasmic RNA interacting protein	SYNCRIP	6q14-q15	0.44583	0.0364461	POS
202062_s_at	sel-1 suppressor of lin-12-like (C. elegans)	SEL1L	14q24.3-q31	0.445805	0.0346768	POS
202947_s_at	glycophorin C (Gerbich blood group)	GYPC	2q14-q21	0.445277	0.0213384	POS
221250_s_at	MAX dimerization protein 3 /// MAX dimerization protein 3	MXD3	5q35.3	0.444801	0.00191295	NEG
204364_s_at	chromosome 2 open reading frame 23	REEP1	2p11.2	0.444735	0.0229338	POS
207791_s_at	RAB1A, member RAS oncogene family	RAB1A	2p14	0.444694	0.0373642	POS
202236_s_at	solute carrier family 16 (monocarboxylic acid transporters), member 1	SLC16A1	1p12	0.444297	0.0022993	POS
216885_s_at	WD repeat domain 42A	WDR42A	1q22-q23	0.443921	0.0336444	POS
1566303_s_at	protein phosphatase 1, regulatory (inhibitor) subunit 11	PPP1R11	6p21.3	0.443847	0.0111382	POS
211537_x_at	mitogen-activated protein kinase kinase kinase 7	MAP3K7	6q16.1-q16.3	0.443342	0.0240035	POS
213553_x_at	apolipoprotein C-I	APOC1	19q13.2	0.44267	0.0276456	NEG
222636_at	Mediator of RNA polymerase II transcription, subunit 28 homolog (yeast)	MED28	4p16	0.44258	0.00293463	POS
221370_at	kruppel-like zinc finger factor X17	LOC649115	N/A	0.442523	0.028707	NEG
1555784_s_at	interleukin-1 receptor-associated kinase 1	IRAK1	Xq28	0.441943	0.0494012	POS
205317_s_at	solute carrier family 15 (H+/peptide transporter), member 2	SLC15A2	3q13.33	0.441816	0.000132267	NEG
203683_s_at	vascular endothelial growth factor B	VEGFB	11q13	0.44136	0.0131432	POS
226130_at	ribosomal protein S16 /// similar to 40S ribosomal protein S16	LOC441876, RPS16	19q13.1, 1p36.21	0.440776	0.0381789	POS
212253_x_at	dystonin	DST	6p12.1	0.44051	0.0476332	POS
238341_at	KIAA0220-like protein	N/A	N/A	0.44019	0.04377	NEG
202483_s_at	RAN binding protein 1	RANBP1	22q11.21	0.438813	0.0169448	POS
203582_s_at	RAB4A, member RAS oncogene family	RAB4A	1q42-q43	0.437945	0.029262	POS
200730_s_at	protein tyrosine phosphatase type IVA, member 1	PTP4A1	6q12	0.437472	0.0072007	POS
209275_s_at	ceroid-lipofuscinosis, neuronal 3, juvenile (Batten, Spielmeyer-Vogt disease)	CLN3	16p12.1	0.43652	0.0417403	POS
219328_at	DEAD (Asp-Glu-Ala-Asp) box polypeptide 31	DDX31	9q34.13	0.436479	0.0279683	NEG
203144_s_at	KIAA0040	KIAA0040	1q24-q25	0.436367	0.0128763	POS
201790_s_at	7-dehydrocholesterol reductase	DHCR7	11q13.2-q13.5	0.436257	0.0124945	POS
1405_i_at	chemokine (C-C motif) ligand 5	CCL5	17q11.2-q12	0.436064	0.00137478	NEG
209471_s_at	farnesyltransferase, CAAX box, alpha	FNTA	8p11	0.435888	0.0351688	POS
208989_s_at	F-box and leucine-rich repeat protein 11	FBXL11	11q13.1	0.434602	0.0135469	POS
214149_s_at	ATPase, H+ transporting, lysosomal 9kDa, V0 subunit e	ATP6V0E1	5q35.2	0.433977	0.00386779	POS
1565611_at	Dynein, cytoplasmic, light polypeptide 2A	DYNLRB1	20q11.21	0.433085	0.035027	NEG
226123_at	chromodomain helicase DNA binding protein 7	CHD7	8q12.2	0.433031	0.01505	POS
203576_at	branched chain aminotransferase 2, mitochondrial	BCAT2	19q13	0.431802	0.00867109	POS
218112_at	mitochondrial ribosomal protein S34	MRPS34	16p13.3	0.431702	0.0030379	POS
203235_at	thimet oligopeptidase 1	THOP1	19q13.3	0.431071	0.00895074	POS
205565_s_at	frataxin	FXN	9q13-q21.1	0.429797	0.0144869	POS
212961_x_at	hypothetical LOC541578 protein	CXorf40B	Xq28	0.429441	0.0105885	POS
218579_s_at	DEAH (Asp-Glu-Ala-His) box polypeptide 35	DHX35	20q11.22-q12	0.428473	0.00125232	POS
1554555_a_at	hypothetical protein FLJ21148	SETD6	16q21	0.427861	0.0253781	POS
208675_s_at	dolichyl-diphosphooligosaccharide-protein glycosyltransferase	DDOST	1p36.1	0.42773	0.00952225	POS
208310_s_at	chromosome 7 open reading frame 28A /// chromosome 7 open reading frame 28B	C7orf28A, C7orf28B	7p22.1	0.426736	0.0434559	POS
206998_x_at	proline-rich protein BstNI subfamily 1 /// BstNI subfamily 3 /// BstNI subfamily 4 /// BstNI subfamily 2	PRB1, PRB2, PRB3, PRB4	12p13.2	0.426527	0.00274073	NEG
202574_s_at	casein kinase 1, gamma 2	CSNK1G2	19p13.3	0.42628	0.0169404	POS
209464_at	aurora kinase B	AURKB	17p13.1	0.426053	0.0241371	POS
1554423_a_at	F-box protein 7	FBXO7	22q12-q13	0.425706	0.023495	POS
208689_s_at	ribophorin II	RPN2	20q12-q13.1	0.425495	0.00298183	POS
204122_at	TYRO protein tyrosine kinase binding protein	TYROBP	19q13.1	0.424817	0.00476995	NEG
210162_s_at	nuclear factor of activated T-cells, cytoplasmic, calcineurin-dependent 1	NFATC1	18q23	0.424345	0.0262969	POS
210786_s_at	Friend leukemia virus integration 1	FLI1	11q24.1-q24.3	0.423877	0.0372772	POS
208992_s_at	signal transducer and activator of transcription 3 (acute-phase response factor)	STAT3	17q21.31	0.423875	0.0188076	POS
1555247_a_at	Rap guanine nucleotide exchange factor (GEF) 6	RAPGEF6	5q31.1	0.423652	0.0331894	NEG
204775_at	chromatin assembly factor 1, subunit B (p60)	CHAF1B	21q22.13	0.42358	0.0166501	POS
208703_s_at	amyloid beta (A4) precursor-like protein 2	APLP2	11q23-q25|11q24	0.423401	0.0411675	POS
201118_at	phosphogluconate dehydrogenase /// phosphogluconate dehydrogenase	PGD	1p36.3-p36.13	0.423254	0.00721536	POS
201158_at	N-myristoyltransferase 1	NMT1	17q21.31	0.422619	0.0203547	POS
230793_at	Leucine rich repeat containing 16	LRRC16	6p22.2	0.422468	0.00790149	POS
206120_at	CD33 antigen (gp67)	CD33	19q13.3	0.42136	0.00937861	POS
221878_at	Hypothetical LOC388969	LOC388969	2p11.2	0.419912	0.0259441	NEG
209053_s_at	Wolf-Hirschhorn syndrome candidate 1	WHSC1	4p16.3	0.419788	0.0150469	POS
231818_x_at	MRNA; cDNA DKFZp666B189 (from clone DKFZp666B189)	N/A	N/A	0.419648	0.00289748	NEG
223010_s_at	OCIA domain containing 1	OCIAD1	4p11	0.419368	0.021645	POS
207614_s_at	cullin 1	CUL1	7q36.1	0.418531	0.041049	POS
221846_s_at	CASK interacting protein 2	CASKIN2	17q25.1	0.418169	0.0119462	NEG
221581_s_at	linker for activation of T cells family, member 2	LAT2	7q11.23	0.417691	0.0257284	POS
211697_x_at	putatative 28 kDa protein /// putatative 28 kDa protein	PNO1	2p14	0.416519	0.0314737	POS
204674_at	lymphoid-restricted membrane protein	LRMP	12p12.1	0.415674	0.00347663	POS
233825_s_at	CD99 antigen-like 2	CD99L2	Xq28	0.414385	0.0109688	POS
201627_s_at	insulin induced gene 1	INSIG1	7q36	0.413658	0.0446056	POS
201386_s_at	DEAH (Asp-Glu-Ala-His) box polypeptide 15	DHX15	4p15.3	0.412991	0.0200628	POS
1554768_a_at	MAD2 mitotic arrest deficient-like 1 (yeast)	MAD2L1	4q27	0.412757	0.0317057	POS
214258_x_at	HIV-1 Tat interacting protein, 60kDa	HTATIP	11q13	0.412209	0.0428787	POS
1565162_s_at	microsomal glutathione S-transferase 1	MGST1	12p12.3-p12.1	0.411227	0.0274916	POS
216705_s_at	adenosine deaminase	ADA	20q12-q13.11	0.410567	0.0289032	POS
200950_at	actin related protein 2/3 complex, subunit 1A, 41kDa	ARPC1A	7q22.1	0.410337	0.0138803	POS
202326_at	euchromatic histone-lysine N-methyltransferase 2	EHMT2	6p21.31	0.409519	0.026196	POS
201204_s_at	Ribosome binding protein 1 homolog 180kDa (dog)	RRBP1	20p12	0.408852	0.0329396	POS
222191_s_at	xylosylprotein beta 1,4-galactosyltransferase, polypeptide 7 (galactosyltransferase I)	B4GALT7	5q35.2-q35.3	0.40798	0.0491363	POS
213592_at	angiotensin II receptor-like 1	AGTRL1	11q12	0.407905	0.0284632	NEG
201529_s_at	replication protein A1, 70kDa	RPA1	17p13.3	0.40779	0.0486033	POS
212827_at	immunoglobulin heavy constant mu /// immunoglobulin heavy constant mu	IGHM	14q32.33	0.407765	0.0352922	NEG
209312_x_at	major histocompatibility complex, class II, DR beta 1 /// major histocompatibility complex, class II, DR beta 1	HLA-DRB1, HLA-DRB4, LOC730415	6p21.3	0.405458	0.0284096	POS
225261_x_at	TH1-like (Drosophila)	TH1L	20q13	0.405371	0.0179688	POS
1556754_at	hypothetical gene supported by AK091031	N/A	N/A	0.404127	0.0138402	NEG
218751_s_at	F-box and WD-40 domain protein 7 (archipelago homolog, Drosophila)	FBXW7	4q31.3	0.40307	0.0022971	POS
201770_at	small nuclear ribonucleoprotein polypeptide A	SNRPA	19q13.1	0.40196	0.0107541	POS
212316_at	nucleoporin 210kDa	NUP210	3p25.1	0.40146	0.022485	POS
208916_at	solute carrier family 1 (neutral amino acid transporter), member 5	SLC1A5	19q13.3	0.400969	0.0260078	POS
215963_x_at	ribosomal protein L3	LOC642741	6q21	0.399761	0.0143654	POS
209584_x_at	apolipoprotein B mRNA editing enzyme, catalytic polypeptide-like 3C	APOBEC3C	22q13.1-q13.2	0.399725	0.0190942	POS
205196_s_at	adaptor-related protein complex 1, sigma 1 subunit	AP1S1	7q22.1	0.399442	0.0318642	POS
201229_s_at	ariadne homolog 2 (Drosophila)	ARIH2	3p21.2-p21.3	0.39793	0.0202947	POS
204132_s_at	forkhead box O3A	FOXO3	6q21	0.397719	0.00743347	POS
223566_s_at	BCL6 co-repressor	BCOR	Xp21.2-p11.4	0.397705	0.0206047	POS
207000_s_at	protein phosphatase 3 (formerly 2B), catalytic subunit, gamma isoform (calcineurin A gamma)	PPP3CC	8p21.3	0.397461	0.0128688	POS
228851_s_at	endosulfine alpha	ENSA	1q21.2	0.396513	0.0263398	POS
221888_at	coiled-coil and C2 domain containing 1A	CC2D1A	19p13.12	0.395563	0.0171871	NEG
225827_at	eukaryotic translation initiation factor 2C, 2	EIF2C2	8q24	0.395324	0.00377924	POS
224319_s_at	hypothetical protein FLJ20232	SMCR7L	22q13	0.394262	0.00968808	POS
221087_s_at	apolipoprotein L, 3	APOL3	22q13.1	0.393721	0.00806608	POS
1555411_a_at	cyclin L1	CCNL1	3q25.32	0.392474	0.0589052	POS
210826_x_at	RAD17 homolog (S. pombe)	RAD17	5q13	0.392085	0.0323398	POS
219084_at	nuclear receptor binding SET domain protein 1	NSD1	5q35.2-q35.3	0.39086	0.00534671	POS
218270_at	mitochondrial ribosomal protein L24	MRPL24	1q21-q22	0.390144	0.0295944	POS
204638_at	acid phosphatase 5, tartrate resistant	ACP5	19p13.3-p13.2	0.388016	0.0141074	NEG
204578_at	KIAA0377 gene product	HISPPD2A	15q15.3	0.386594	0.0111925	NEG
1556402_at	Hypothetical gene supported by AK128305	FLJ46446	Xq13.1	0.38606	0.00833469	POS
200634_at	profilin 1	PFN1	17p13.3	0.385568	0.022242	POS
211922_s_at	catalase /// catalase	CAT	11p13	0.384368	0.000724559	POS
1554678_s_at	heterogeneous nuclear ribonucleoprotein D-like	HNRPDL	4q13-q21	0.383704	0.0303256	POS
1554242_a_at	coagulation factor C homolog, cochlin (Limulus polyphemus)	COCH	14q12-q13	0.383533	0.0307728	POS
221293_s_at	differentially expressed in FDCP 6 homolog (mouse)	DEF6	6p21.33-p21.1	0.383027	0.0156493	POS
241667_x_at	Forkhead box O1A (rhabdomyosarcoma)	N/A	N/A	0.381054	0.0386287	NEG
208631_s_at	hydroxyacyl-Coenzyme A dehydrogenase	HADHA	2p23	0.380859	0.0468219	POS
201267_s_at	proteasome (prosome, macropain) 26S subunit, ATPase, 3	PSMC3	11p12-p13	0.380838	0.0255935	POS
235401_s_at	Fc receptor-like and mucin-like 1	FCRLA	1q23.3	0.380684	0.0200417	POS
208306_x_at	Major histocompatibility complex, class II, DR beta 4	HLA-DRB1	6p21.3	0.379872	0.0460205	POS
221297_at	G protein-coupled receptor, family C, group 5, member D	GPRC5D	12p13.3	0.378934	0.0343721	POS
220935_s_at	CDK5 regulatory subunit associated protein 2	CDK5RAP2	9q33.2	0.378775	0.00895627	POS
215735_s_at	tuberous sclerosis 2	TSC2	16p13.3	0.378411	0.0177201	POS
217099_s_at	gem (nuclear organelle) associated protein 4	GEMIN4	17p13	0.377942	0.0328586	POS
230848_s_at	MAX gene associated	MGA	15q14	0.376328	0.0334182	POS
243135_x_at	Nudix (nucleoside diphosphate linked moiety X)-type motif 1	N/A	N/A	0.375671	0.00212765	NEG
208811_s_at	DnaJ (Hsp40) homolog, subfamily B, member 6	DNAJB6	7q36.3	0.375576	0.0196474	POS
217543_s_at	membrane-bound transcription factor protease, site 1	MBTPS1	16|16q24	0.37495	0.0378497	POS
208627_s_at	nuclease sensitive element binding protein 1	YBX1	1p34	0.374698	0.0212363	POS
210154_at	malic enzyme 2, NAD(+)-dependent, mitochondrial	ME2	6p25-p24|18q21	0.373067	0.045407	POS
212166_at	exportin 7	XPO7	8p21	0.372742	0.0228612	POS
213330_s_at	stress-induced-phosphoprotein 1 (Hsp70/Hsp90-organizing protein)	STIP1	11q13	0.368966	0.0120548	POS
216591_s_at	succinate dehydrogenase complex, subunit C, integral membrane protein, 15kDa	hCG_1776980, SDHC	17p13.3, 1q23.3	0.368116	0.0149635	POS
209213_at	carbonyl reductase 1	CBR1	21q22.13	0.368098	0.0451944	POS
1567080_s_at	ceroid-lipofuscinosis, neuronal 6, late infantile, variant	CLN6	15q23	0.367247	0.0122756	POS
234924_s_at	zinc finger protein 687	ZNF687	1q21.2	0.367115	0.00052806	POS
225353_s_at	complement component 1, q subcomponent, gamma polypeptide	C1QC	1p36.11	0.366363	0.0191294	NEG
224361_s_at	interleukin 17 receptor B /// interleukin 17 receptor B	IL17RB	3p21.1	0.364616	0.0127074	NEG
216232_s_at	GCN1 general control of amino-acid synthesis 1-like 1 (yeast)	GCN1L1	12q24.2	0.361982	0.0387674	POS
204427_s_at	coated vesicle membrane protein	TMED2	12q24.31	0.360718	0.03551	POS
201104_x_at	hypothetical protein DJ328E19.C1.1 /// hypothetical protein FLJ20719 /// hypothetical protein LOC200030 /// hypothetical protein MGC8902 /// AE01 mRNA /// AG1 protein /// hypothetical LOC440675	LOC728980, LOC730476, NBPF10, NBPF11, NBPF14, NBPF15, NBPF16, NBPF20, NBPF8, XXyac-YX155B6.1	1q12-q21.2, 1q21.1	0.359983	0.0376017	POS
214484_s_at	opioid receptor, sigma 1	OPRS1	9p13.3	0.359193	0.0443315	POS
210299_s_at	four and a half LIM domains 1	FHL1	Xq26	0.358897	0.0211517	POS
1555278_a_at	cytoskeleton associated protein 5	CKAP5	11p11.2	0.357874	0.0120243	POS
204562_at	interferon regulatory factor 4	IRF4	6p25-p23	0.356075	0.0255979	POS
204380_s_at	fibroblast growth factor receptor 3 (achondroplasia, thanatophoric dwarfism)	FGFR3	4p16.3	0.35581	0.0453813	POS
200008_s_at	GDP dissociation inhibitor 2 /// GDP dissociation inhibitor 2	GDI2	10p15	0.354795	0.03115	POS
221428_s_at	transducin (beta)-like 1X-linked receptor 1 /// transducin (beta)-like 1X-linked receptor 1	TBL1XR1	3q26.32	0.353619	0.00705258	POS
214550_s_at	transportin 3	TNPO3	7q32.1	0.352846	0.0443014	POS
208729_x_at	major histocompatibility complex, class I, B	HLA-B	6p21.3	0.352363	0.0190549	POS
1560339_s_at	nucleosome assembly protein 1-like 4	NAP1L4	11p15.5	0.349355	0.00264202	POS
200973_s_at	tetraspanin 3	TSPAN3	15q24.3	0.34885	0.0453461	POS
219120_at	hypothetical protein FLJ21945	C2orf44	2p23.3	0.347458	0.00815489	POS
203923_s_at	cytochrome b-245, beta polypeptide (chronic granulomatous disease)	CYBB	Xp21.1	0.346311	0.0430049	POS
201721_s_at	lysosomal associated multispanning membrane protein 5	LAPTM5	1p34	0.342062	0.016518	POS
244287_at	splicing factor, arginine/serine-rich 12	SFRS12	5q12.3	0.338755	0.0307998	NEG
218805_at	GTPase, IMAP family member 5 /// GTPase, IMAP family member 5	GIMAP5	7q36.1	0.337209	0.0199237	POS
205270_s_at	lymphocyte cytosolic protein 2 (SH2 domain containing leukocyte protein of 76kDa)	LCP2	5q33.1-qter	0.334473	0.0501463	POS
211358_s_at	CDKN1A interacting zinc finger protein 1	CIZ1	9q34.1	0.332674	0.017296	POS
200656_s_at	procollagen-proline, 2-oxoglutarate 4-dioxygenase (proline 4-hydroxylase), beta polypeptide (protein disulfide isomerase-associated 1)	P4HB	17q25	0.331937	0.0385651	POS
217356_s_at	phosphoglycerate kinase 1	PGK1	Xq13	0.331684	0.0171398	POS
208983_s_at	platelet/endothelial cell adhesion molecule (CD31 antigen)	PECAM1	17q23	0.330098	0.0297069	POS
226319_s_at	THO complex 4	LOC644811, THOC4	17q25.3	0.328975	0.014594	POS
203125_x_at	solute carrier family 11 (proton-coupled divalent metal ion transporters), member 2	SLC11A2	12q13	0.328821	0.0122251	POS
223514_at	caspase recruitment domain family, member 11	CARD11	7p22	0.326722	0.0224925	POS
215193_x_at	major histocompatibility complex, class II, DR beta 1	HLA-DRB1, HLA-DRB3, HLA-DRB4, LOC730415	6p21.3	0.326693	0.0274261	POS
201781_s_at	aryl hydrocarbon receptor interacting protein	AIP	11q13.3	0.326228	0.0234052	POS
214794_at	proliferation-associated 2G4, 38kDa	PA2G4	12q13.2	0.325418	0.0111624	POS
222264_at	hypothetical protein DKFZp762N1910	HNRPUL2	11q12.3	0.321553	0.0170412	POS
206544_x_at	SWI/SNF related, matrix associated, actin dependent regulator of chromatin, subfamily a, member 2	SMARCA2	9p22.3	0.318444	0.0374497	POS
218229_s_at	pogo transposable element with KRAB domain	POGK	1q24.1	0.317524	0.0446815	POS
1555812_a_at	Rho GDP dissociation inhibitor (GDI) beta	ARHGDIB	12p12.3	0.314296	0.0434547	POS
242741_x_at	NOL1/NOP2/Sun domain family, member 4	N/A	N/A	0.312159	0.000842094	NEG
208074_s_at	adaptor-related protein complex 2, sigma 1 subunit	AP2S1	19q13.2-q13.3	0.310823	0.0284271	POS
34210_at	CD52 antigen (CAMPATH-1 antigen)	CD52	1p36	0.310381	0.00343705	POS
206967_at	cyclin T1	CCNT1	12pter-qter	0.309592	0.00163789	NEG
216032_s_at	chromosome 20 open reading frame 47	ERGIC3	20pter-q12	0.30829	0.0189879	POS
1570192_at	Homo sapiens, clone IMAGE:4480721, mRNA	N/A	N/A	0.307985	0.032408	NEG
215684_s_at	activating signal cointegrator 1 complex subunit 2	ASCC2	22q12.1	0.305375	0.0286053	POS
209208_at	mannose-P-dolichol utilization defect 1	MPDU1	17p13.1-p12	0.305077	0.0281459	POS
210337_s_at	ATP citrate lyase	ACLY	17q12-q21	0.304465	0.037412	POS
207108_s_at	Nipped-B homolog (Drosophila)	NIPBL	5p13.2	0.303979	0.0364405	POS
208894_at	major histocompatibility complex, class II, DR alpha /// major histocompatibility complex, class II, DR alpha	HLA-DRA	6p21.3	0.301459	0.0350593	POS
203747_at	aquaporin 3	AQP3	9p13	0.30061	0.00286651	POS
216560_x_at	Immunoglobulin lambda constant 1 (Mcg marker) /// Immunoglobulin lambda variable 3-21	IGL@	22q11.1-q11.2	0.300188	0.0355833	POS
201376_s_at	heterogeneous nuclear ribonucleoprotein F	HNRPF	10q11.21-q11.22	0.297774	0.022826	POS
202593_s_at	membrane interacting protein of RGS16	MIR16	16p12-p11.2	0.297694	0.051311	POS
214359_s_at	heat shock 90kDa protein 1, beta	HSP90AB1	6p12	0.297057	0.0067328	POS
203842_s_at	microtubule-associated protein, RP/EB family, member 3	MAPRE3	2p23.3-p23.1	0.296848	0.0087645	NEG
201813_s_at	TBC1 domain family, member 5	TBC1D5	3p24.3	0.294876	0.00895716	POS
210425_x_at	golgin-67	GOLGA8B	15q14	0.293911	0.0530036	POS
213655_at	Tyrosine 3-monooxygenase/tryptophan 5-monooxygenase activation protein, epsilon polypeptide	N/A	N/A	0.292838	0.0525598	POS
203334_at	DEAH (Asp-Glu-Ala-His) box polypeptide 8	DHX8	17q21.31	0.291244	0.048783	POS
215049_x_at	CD163 antigen	CD163	12p13.3	0.287988	0.00971596	NEG
233851_s_at	torsin family 3, member A	TOR3A	1q25.2	0.281619	0.049296	POS
207239_s_at	PCTAIRE protein kinase 1	PCTK1	Xp11.3-p11.23	0.281154	0.00210009	POS
201490_s_at	peptidylprolyl isomerase F (cyclophilin F)	PPIF	10q22-q23	0.275733	0.0424481	POS
208699_x_at	transketolase (Wernicke-Korsakoff syndrome)	TKT	3p14.3	0.274462	0.0479282	POS
207163_s_at	v-akt murine thymoma viral oncogene homolog 1	AKT1	14q32.32|14q32.32	0.273009	0.0107171	POS
231715_s_at	pyrroline-5-carboxylate reductase family, member 2	PYCR2	1q42.12	0.263538	0.0066772	POS
208885_at	lymphocyte cytosolic protein 1 (L-plastin)	LCP1	13q14.3	0.257781	0.0549213	POS
1555814_a_at	ras homolog gene family, member A	RHOA	3p21.3	0.254235	0.0334996	POS
223875_s_at	enhancer of polycomb homolog 1 (Drosophila)	EPC1	10p11	0.247106	0.0406869	NEG
205462_s_at	hippocalcin-like 1	HPCAL1	2p25.1	0.247001	0.0103583	POS
209901_x_at	allograft inflammatory factor 1	AIF1	6p21.3	0.242078	0.0467773	NEG
1555730_a_at	cofilin 1 (non-muscle)	CFL1	11q13	0.239455	0.0191985	POS
207622_s_at	ATP-binding cassette, sub-family F (GCN20), member 2	ABCF2	7q36	0.217069	0.029659	POS
224410_s_at	limb region 1 homolog (mouse) /// limb region 1 homolog (mouse)	LMBR1	7q36	0.209599	0.0349912	POS
207681_at	chemokine (C-X-C motif) receptor 3	CXCR3	Xq13	0.20542	0.042202	NEG
216604_s_at	Solute carrier family 7 (cationic amino acid transporter, y+ system), member 8	SLC7A8	14q11.2	0.203219	0.0576024	NEG
210543_s_at	protein kinase, DNA-activated, catalytic polypeptide	PRKDC	8q11	0.197211	0.0379477	POS
201123_s_at	eukaryotic translation initiation factor 5A	EIF5A	17p13-p12	0.192677	0.030797	POS
233555_s_at	sulfatase 2	SULF2	20q12-q13.2	0.17959	0.0378971	POS
211450_s_at	mutS homolog 6 (E. coli)	MSH6	2p16	0.152087	0.0279118	POS
210338_s_at	heat shock 70kDa protein 8	HSPA8	11q24.1	0.132437	0.0379152	POS
